# Supplementary material
Source: MDPI journal article supplement (https://www.mdpi.com/2304-6740/7/7/82)
Supplement: s1 [file s1]

# Supplementary Materials: A Comparative Study of the Catalytic Behaviour of Alkoxy-1,3,5-Triazapentadiene Copper(II) Complexes in Cyclohexane Oxidation

Oksana V. Nesterova, Maximilian N. Kopylovich and Dmytro S. Nesterov

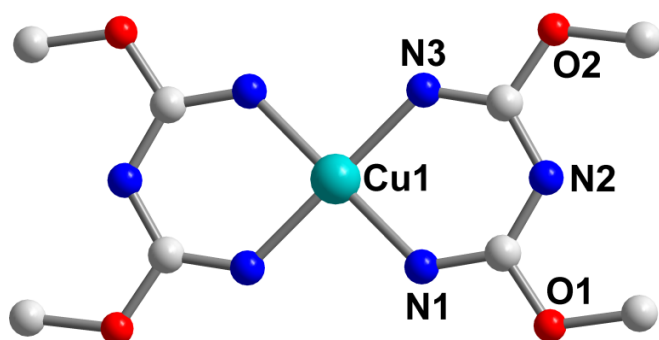

**Figure S1.** Ball-and-stick representation of **1** with atom numbering. H atoms are omitted for clarity.

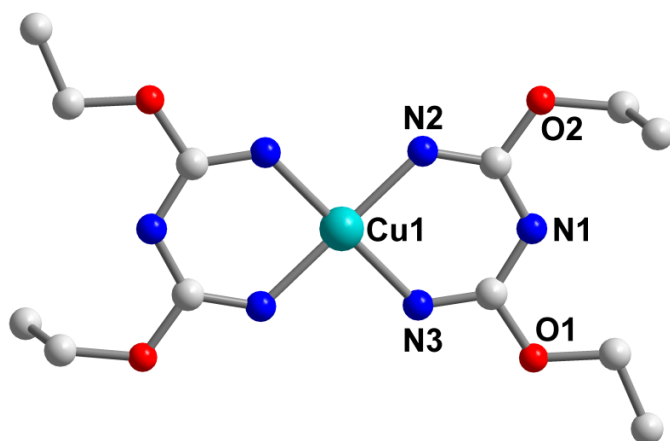

**Figure S2.** Ball-and-stick representation of **2** with atom numbering. H atoms are omitted for clarity.

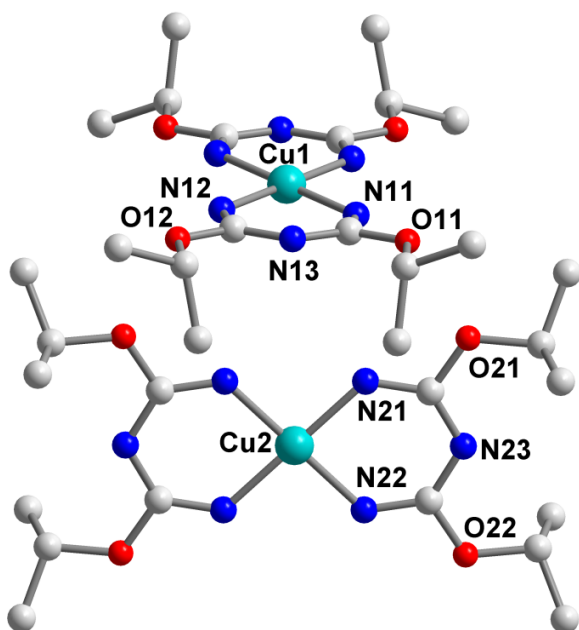

**Figure S3.** Ball-and-stick representation of **4** with atom numbering. H atoms are omitted for clarity.

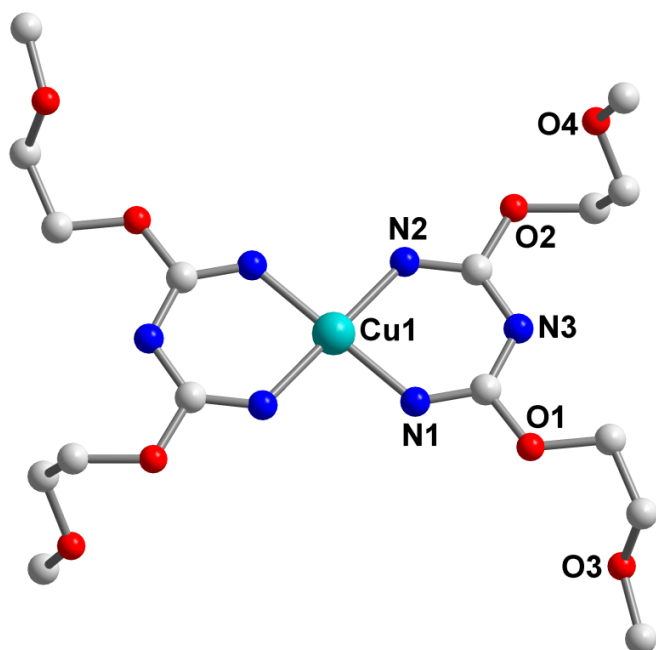

**Figure S4.** Ball-and-stick representation of **5** with atom numbering. H atoms are omitted for clarity.

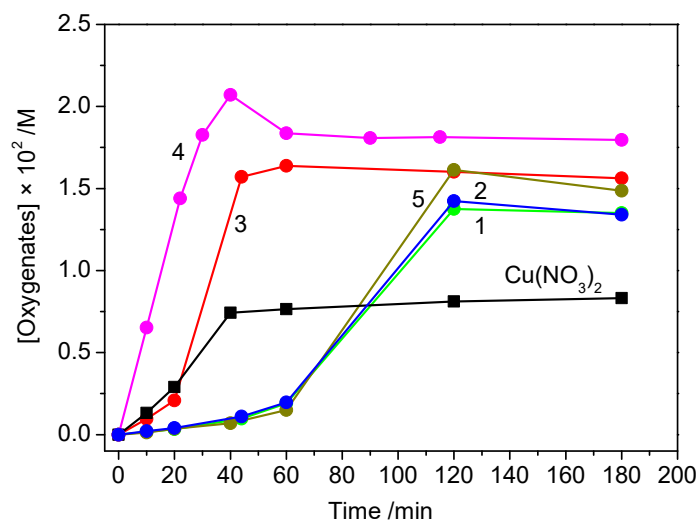

**Figure S5.** Accumulations of the reaction products (sum of cyclohexanol and cyclohexanone) in the oxidation of cyclohexane (0.2 M) with  $\text{H}_2\text{O}_2$  (0.5 M) catalysed by **1–5** ( $1 \times 10^{-3}$  M) and by  $\text{Cu}(\text{NO}_3)_2$  ( $1 \times 10^{-3}$  M) in the presence of pyridine (0.01 M) in acetonitrile at 50 °C.

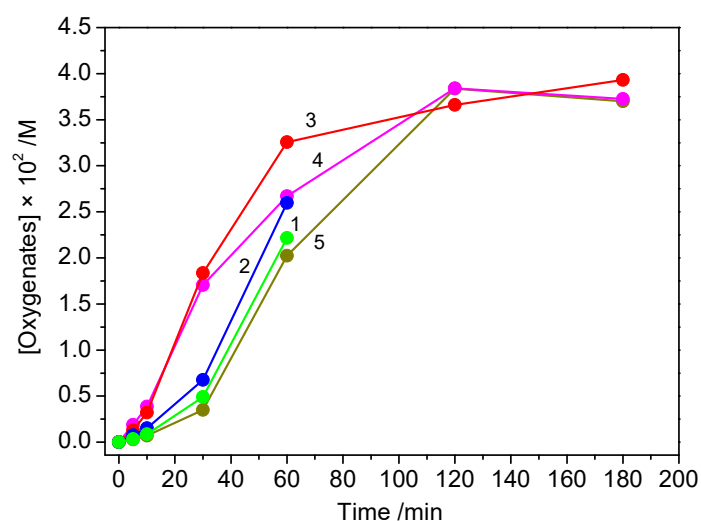

**Figure S6.** Accumulations of the reaction products (sum of cyclohexanol and cyclohexanone) in the oxidation of cyclohexane (0.2 M) with  $\text{H}_2\text{O}_2$  (1 M) catalysed by **1–5** ( $1 \times 10^{-3}$  M) in the presence of pyridine (0.01 M) in acetonitrile at 50 °C.

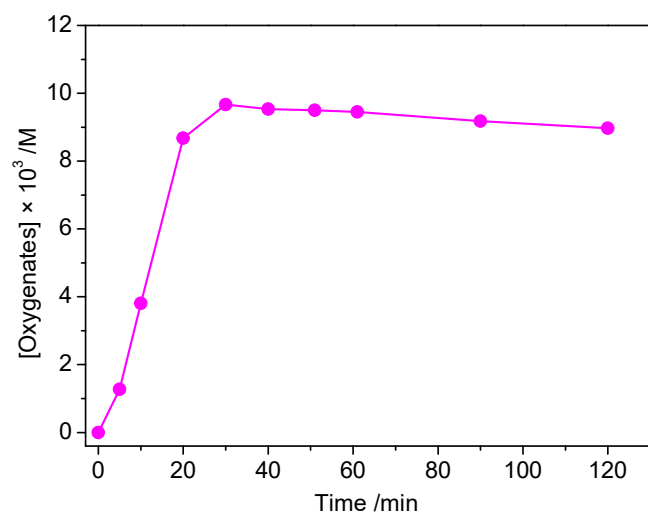

**Figure S7.** Accumulation of the reaction products (sum of cyclohexanol and cyclohexanone) in the oxidation of cyclohexane (0.2 M) with  $\text{H}_2\text{O}_2$  (0.35 M) catalysed by **4** ( $1 \times 10^{-3}$  M) in the presence of pyridine (0.01 M) in acetonitrile at 50 °C.

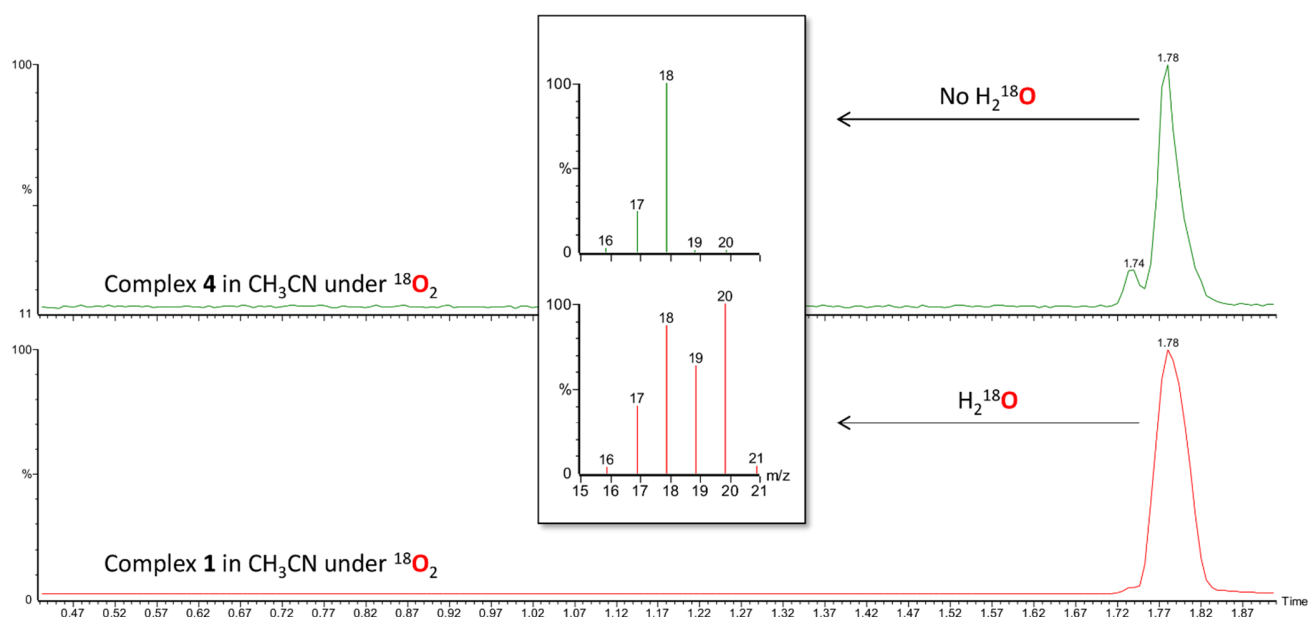

**Figure S8.** Fragments of the chromatograms of the acetonitrile solutions ( $2 \times 10^{-3}$  M) of **1** (bottom) and **4** (top) after stirring for 24 h under  $^{18}\text{O}_2$  atmosphere at room temperature, showing the peak at 1.78 min attributable to water. The inset shows the respective mass-spectra. The presence 19 and 20  $m/z$  peaks in the case of the complex **1** account for  $\text{H}_2^{18}\text{O}$  water. The small peak at 1.74 min corresponds to air.

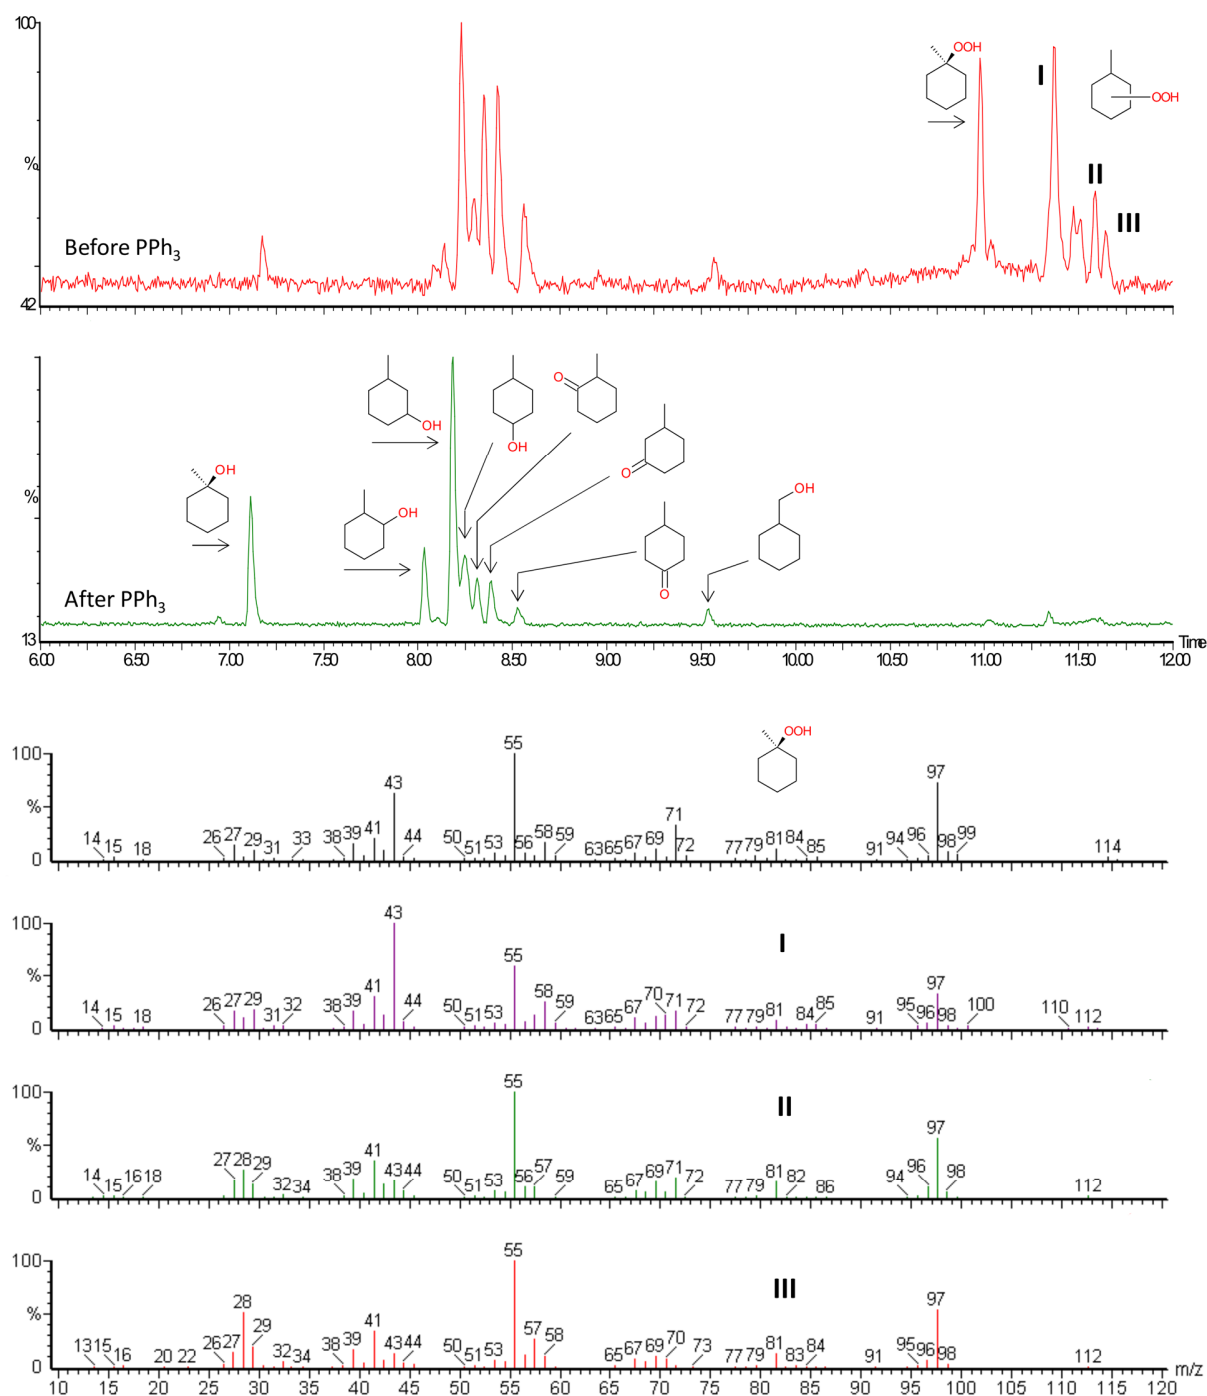

**Figure S9.** Top: fragments of the chromatograms recorded before and after addition of PPh<sub>3</sub> showing the reaction products in the oxidation of methylcyclohexane (0.2 M) with H<sub>2</sub>O<sub>2</sub> (0.5 M) catalysed by **4** ( $1 \times 10^{-3}$  M) in the presence of pyridine (0.01 M) in acetonitrile at 50 °C after 2 h. Bottom: EI-MS spectra of the peaks attributed to methylcyclohexyl hydroperoxides.

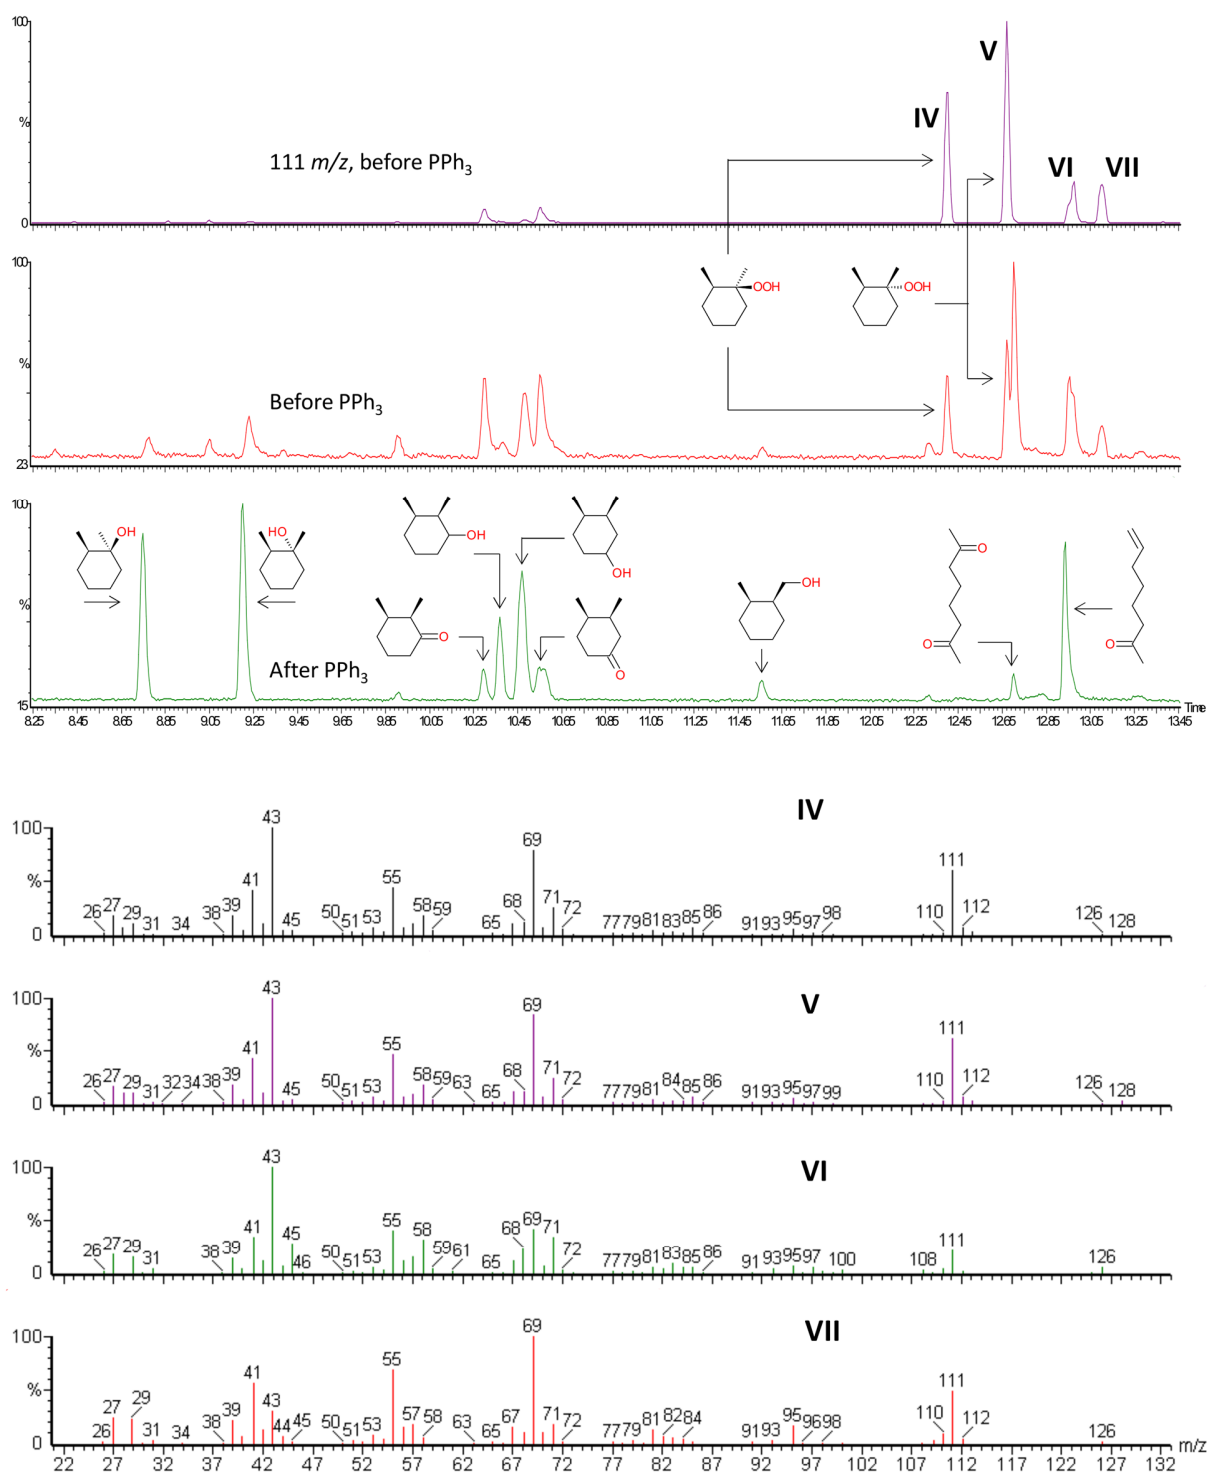

**Figure S10.** Top: fragments of the chromatograms recorded before and after addition of PPh<sub>3</sub> showing the reaction products in the oxidation of *cis*-1,2-dimethylcyclohexane (0.2 M) with H<sub>2</sub>O<sub>2</sub> (0.5 M) catalysed by **4** ( $1 \times 10^{-3}$  M) in the presence of pyridine (0.01 M) in acetonitrile at 50 °C after 2 h. Bottom: EI-MS spectra of the peaks attributed to *cis*-1,2-dimethylcyclohexyl hydroperoxides.

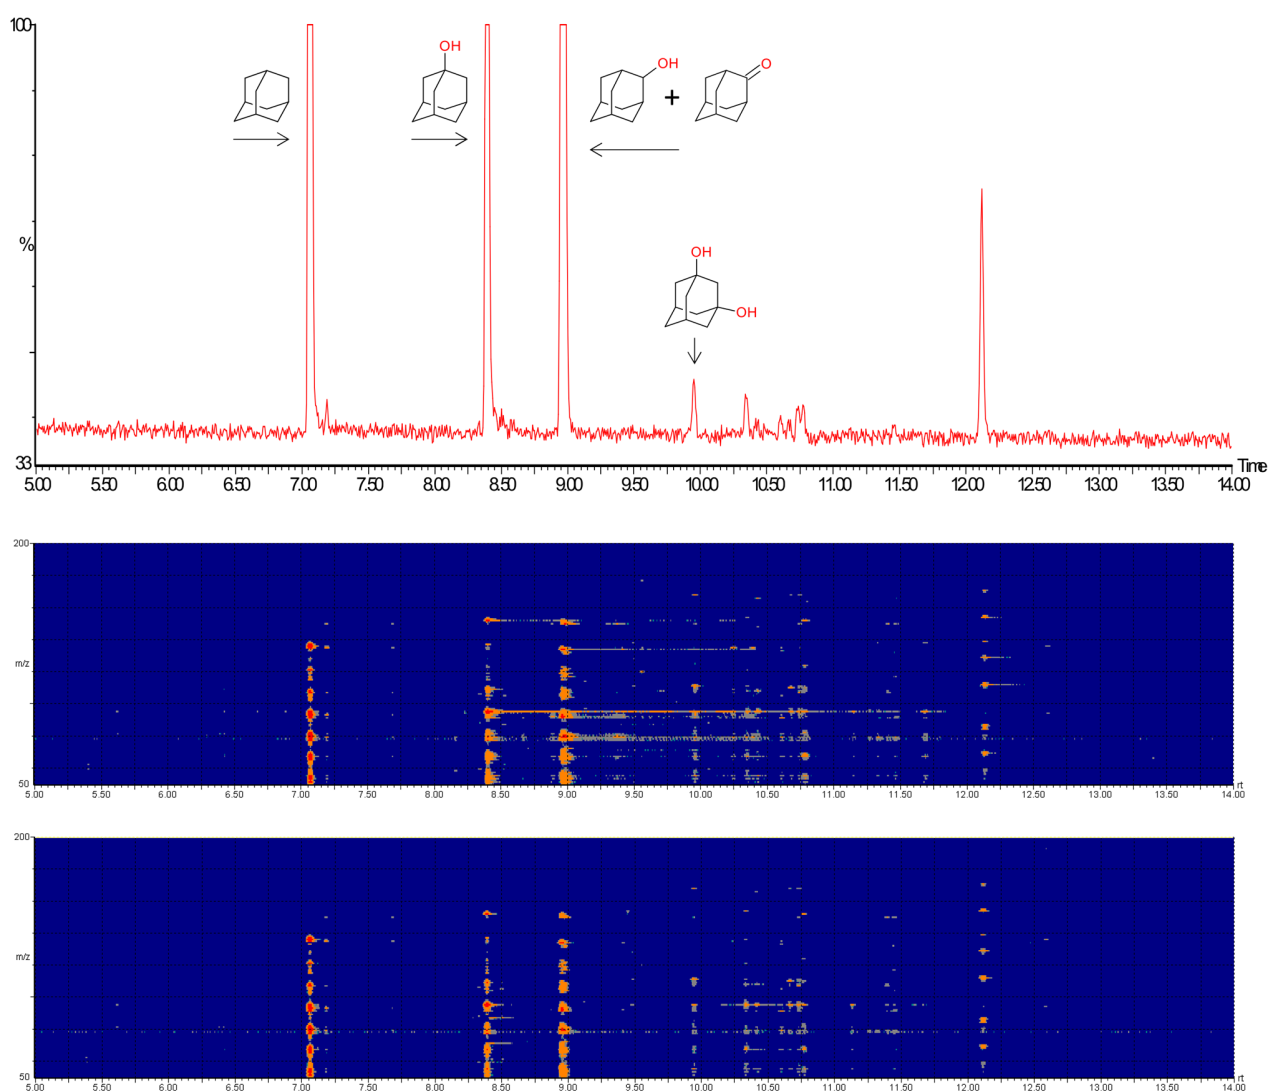

**Figure S11** Top: fragment of the chromatograms recorded after addition of PPh<sub>3</sub> showing the reaction products in the oxidation of adamantane (0.2 M) with H<sub>2</sub>O<sub>2</sub> (0.5 M) catalysed by **4** ( $1 \times 10^{-3}$  M) in the presence of pyridine (0.01 M) in acetonitrile at 50 °C after 2 h. Middle and bottom: GCMS 2D maps of the chromatograms recorded before (middle) and after (bottom) addition of PPh<sub>3</sub>, showing no difference in the by-products. The peak 12.2 min is believed to be a residue formed from the degradation of the complex **4**.
